# Supplementary material
Source: MDPI journal article supplement (https://www.mdpi.com/2071-1050/15/14/11369)
Supplement: s1 [file s1]

## Supplementary Materials:

**Table S1.** Statistics on evaluation indexes for the years 2012-2020

| Index<br>Value | $U_{11}$ | $U_{12}$ | $U_{13}$ | $U_{14}$ | $U_{21}$ | $U_{22}$ | $U_{23}$ | $U_{31}$ | $U_{32}$ | $U_{33}$ | $U_{41}$ | $U_{42}$ | $U_{43}$ | $U_{44}$ |
|----------------|----------|----------|----------|----------|----------|----------|----------|----------|----------|----------|----------|----------|----------|----------|
| 2012           | 681.7    | 361.13   | 121.98   | 27.60    | 731      | 15.05    | 75.00    | 4.69     | 94.06    | 41.1     | 14941.72 | 66.3     | 0.79     | 31.90    |
| 2013           | 727.5    | 427.27   | 106.20   | 32.80    | 733      | 17.84    | 80.09    | 5.26     | 86.57    | 43.0     | 13791.93 | 71.7     | 0.79     | 32.05    |
| 2014           | 754.2    | 330.41   | 143.30   | 25.60    | 739      | 17.27    | 83.43    | 5.73     | 83.08    | 44.6     | 15376.00 | 76.7     | 1.23     | 30.30    |
| 2015           | 788.2    | 367.64   | 121.76   | 28.70    | 745      | 9.04     | 75.82    | 6.09     | 73.72    | 45.7     | 9618.34  | 79.2     | 2.57     | 28.05    |
| 2016           | 859.7    | 488.49   | 91.68    | 38.50    | 751      | 14.02    | 67.94    | 6.58     | 68.45    | 47.4     | 7661.80  | 87.6     | 7.82     | 27.70    |
| 2017           | 829.3    | 432.54   | 103.58   | 34.50    | 759      | 1.47     | 68.36    | 7.09     | 63.55    | 48.6     | 3007.53  | 86.8     | 6.73     | 27.87    |
| 2018           | 936.7    | 564.79   | 76.46    | 45.30    | 766      | 8.26     | 69.17    | 7.45     | 58.13    | 50.1     | 2659.32  | 86.9     | 7.51     | 28.06    |
| 2019           | 663.0    | 377.59   | 113.91   | 30.40    | 769      | 4.87     | 70.08    | 7.80     | 55.26    | 50.1     | 2817.26  | 95.2     | 4.36     | 26.85    |
| 2020           | 1023.3   | 522.79   | 81.17    | 42.54    | 771      | -0.07    | 70.46    | 8.07     | 52.67    | 50.1     | 2543.66  | 95.5     | 0.54     | 27.15    |

**Table S2.** Data collection of indexes under four scenarios and three water resources scenarios in 2025

[illegible]

**Table S3.** Data collection of indexes under four scenarios and three water resources scenarios in 2030

[illegible]
